# Supplementary material
Source: publisher figshare collection journal article supplement (https://tandf.figshare.com/articles/dataset/_/7406483)
Supplement: Supplementary file 1 [file 1]

**Supplementary Table 2:** Influence of different quercetin concentrations supplemented into cereal based agar on the mean *in vitro* contents of aurofusarin (AUF), zearalenone (ZEA), diacetoxyscirpenol (DAS), neosolaniol (NEO), T-2/HT-2 toxins (T-2/HT-2) and nivalenol (NIV) in  $\mu\text{g kg}^{-1}$  and percent reduction relative to the untreated control (%) of *Fusarium graminearum*, *F. langsethiae* and *F. poae* (n = 675). Negative values represent increased toxin production compared with the untreated control. Mean values in rows with different letters indicate significant differences between concentrations according to a Tukey test ( $\alpha=0.05$ ).

| Species               | Mycotoxin | Quercetin concentration (µg kg <sup>-1</sup> ) |    |        |         |        |        |         |    |       |         |   |
|-----------------------|-----------|------------------------------------------------|----|--------|---------|--------|--------|---------|----|-------|---------|---|
|                       |           | Control                                        |    | 1'000  |         | 10'000 |        | 100'000 |    |       |         |   |
| <i>F. graminearum</i> | AUF       | 9'018                                          | bc | 36'183 | (-301%) | a      | 18'678 | (-107%) | ab | 2'050 | (77%)   | c |
|                       | ZEA       | 6                                              | a  | 2      | (67%)   | a      | 4      | (33%)   | a  | 2     | (67%)   | a |
| <i>F. langsethiae</i> | DAS       | 1'047                                          | a  | 268    | (74%)   | ab     | 440    | (58%)   | ab | 187   | (82%)   | b |
|                       | NEO       | 1'508                                          | a  | 458    | (70%)   | ab     | 620    | (59%)   | ab | 326   | (78%)   | b |
|                       | T-2/HT-2  | 13'511                                         | a  | 5'573  | (59%)   | a      | 9'009  | (33%)   | a  | 3'274 | (76%)   | a |
| <i>F. poae</i>        | AUF       | 413                                            | b  | 3'647  | (-783%) | a      | 1'459  | (-253%) | ab | 100   | (76%)   | c |
|                       | DAS       | 110                                            | b  | 245    | (-123%) | a      | 127    | (-15%)  | b  | 329   | (-199%) | a |
|                       | NIV       | 3                                              | a  | 1      | (67%)   | a      | 1      | (67%)   | a  | 4     | (-33%)  | a |
