# Supplementary material
Source: publisher figshare collection journal article supplement (https://tandf.figshare.com/articles/dataset/_/7406483)
Supplement: Supplementary file 2 [file 1]

**Supplementary Table 4:** Influence of different vanillic acid concentrations supplemented into cereal based agar on the mean *in vitro* contents of aurofusarin (AUF), zearalenone (ZEA), diacetoxyscirpenol (DAS), neosolaniol (NEO), T-2/HT-2 toxins (T-2/HT-2) and nivalenol (NIV) in  $\mu\text{g kg}^{-1}$  and percent reduction relative to the untreated control (%) of *Fusarium graminearum*, *F. langsethiae* and *F. poae* (n = 675). Mean values in rows with different letters indicate significant differences between concentrations according to a Tukey test ( $\alpha=0.05$ ).

| Species               | Mycotoxin | Vanillic acid concentration ( $\mu\text{g kg}^{-1}$ ) |   |        |       |   |        |       |   |         |       |   |
|-----------------------|-----------|-------------------------------------------------------|---|--------|-------|---|--------|-------|---|---------|-------|---|
|                       |           | Control                                               |   | 1'000  |       |   | 10'000 |       |   | 100'000 |       |   |
| <i>F. graminearum</i> | AUF       | 137'240                                               | a | 28'505 | (79%) | b | 22'768 | (83%) | b | 20'094  | (85%) | b |
|                       | ZEA       | 34                                                    | a | 3      | (91%) | b | 4      | (88%) | b | 5       | (85%) | b |
| <i>F. langsethiae</i> | DAS       | 3'643                                                 | a | 440    | (88%) | b | 417    | (89%) | b | 454     | (88%) | b |
|                       | NEO       | 6'734                                                 | a | 653    | (90%) | b | 727    | (89%) | b | 1'070   | (84%) | b |
|                       | T-2/HT-2  | 47'379                                                | a | 9'330  | (80%) | b | 8'785  | (81%) | b | 11'442  | (76%) | b |
| <i>F. poae</i>        | AUF       | 41'565                                                | a | 1'751  | (96%) | b | 2'447  | (94%) | b | 4'033   | (90%) | b |
|                       | DAS       | 4'759                                                 | a | 185    | (96%) | c | 254    | (95%) | c | 891     | (81%) | b |
|                       | NIV       | 176                                                   | a | 2      | (99%) | b | 2      | (99%) | b | 51      | (71%) | b |
