# Supplementary material
Source: publisher figshare collection journal article supplement (https://tandf.figshare.com/articles/dataset/_/7406483)
Supplement: Supplementary file 3 [file 1]

**Supplementary Table 3:** Influence of different rutin concentrations supplemented into cereal based agar on the mean *in vitro* contents of aurofusarin (AUF), zearalenone (ZEA), diacetoxyscirpenol (DAS), neosolaniol (NEO), T-2/HT-2 toxins (T-2/HT-2) and nivalenol (NIV) in  $\mu\text{g kg}^{-1}$  and percent reduction relative to the untreated control (%) of *Fusarium graminearum*, *F. langsethiae* and *F. poae* (n = 675). Negative values represent increased toxin production compared with the untreated control. Mean values in rows with different letters indicate significant differences between concentrations according to a Tukey test ( $\alpha=0.05$ ).

| Species               | Mycotoxin | Rutin concentration (µg kg <sup>-1</sup> ) |    |        |         |   |        |        |    |         |       |   |
|-----------------------|-----------|--------------------------------------------|----|--------|---------|---|--------|--------|----|---------|-------|---|
|                       |           | Control                                    |    | 100    |         |   | 10'000 |        |    | 100'000 |       |   |
| <i>F. graminearum</i> | AUF       | 9'018                                      | ab | 22'954 | (-155%) | a | 15'547 | (-72%) | ab | 3'633   | (60%) | b |
|                       | ZEA       | 6                                          | a  | 4      | (33%)   | a | 3      | (50%)  | a  | 3       | (50%) | a |
| <i>F. langsethiae</i> | DAS       | 1'047                                      | a  | 366    | (65%)   | a | 342    | (67%)  | a  | 261     | (75%) | a |
|                       | NEO       | 1'508                                      | a  | 580    | (62%)   | a | 539    | (64%)  | a  | 462     | (69%) | a |
|                       | T-2/HT-2  | 13'510                                     | a  | 7'401  | (45%)   | a | 6'697  | (50%)  | a  | 4'828   | (64%) | a |
| <i>F. poae</i>        | AUF       | 413                                        | a  | 710    | (-72%)  | a | 522    | (-26%) | a  | 71      | (83%) | b |
|                       | DAS       | 4'759                                      | a  | 188    | (96%)   | b | 164    | (97%)  | b  | 116     | (98%) | b |
|                       | NIV       | 3                                          | a  | 2      | (33%)   | a | 2      | (33%)  | a  | 2       | (33%) | a |
