# Supplementary material
Source: publisher figshare collection journal article supplement (https://tandf.figshare.com/articles/dataset/_/7406483)
Supplement: Supplementary file 4 [file 1]

**Supplementary Table 1:** Influence of different p-hydroxybenzoic acid concentrations supplemented into cereal based agar on the mean *in vitro* contents of aurofusarin (AUF), zearalenone (ZEA), diacetoxyscirpenol (DAS), neosolaniol (NEO), T-2/HT-2 toxins (T-2/HT-2) and nivalenol (NIV) in  $\mu\text{g kg}^{-1}$  and percent reduction relative to the untreated control (%) of *Fusarium graminearum*, *F. langsethiae* and *F. poae* (n = 675). Mean values in rows with different letters indicate significant differences between concentrations according to a Tukey test ( $\alpha=0.05$ ).

| Species               | Mycotoxin | p-hydroxybenzoic acid concentration ( $\mu\text{g kg}^{-1}$ ) |   |        |       |   |        |        |   |         |       |   |
|-----------------------|-----------|---------------------------------------------------------------|---|--------|-------|---|--------|--------|---|---------|-------|---|
|                       |           | Control                                                       |   | 1'000  |       |   | 10'000 |        |   | 100'000 |       |   |
| <i>F. graminearum</i> | AUF       | 137'240                                                       | a | 35'283 | (74%) | b | 31'365 | (77%)  | b | 21'218  | (85%) | b |
|                       | ZEA       | 34                                                            | a | 3      | (6%)  | b | 5      | (94%)  | b | 5       | (98%) | b |
| <i>F. langsethiae</i> | DAS       | 3'643                                                         | a | 440    | (88%) | b | 338    | (91%)  | b | 451     | (88%) | b |
|                       | NEO       | 6'734                                                         | a | 648    | (90%) | b | 583    | (91%)  | b | 1'076   | (84%) | b |
|                       | T-2/HT-2  | 47'379                                                        | a | 9'265  | (80%) | b | 7'480  | (84%)  | b | 12'719  | (73%) | b |
| <i>F. poae</i>        | AUF       | 41'565                                                        | a | 3'798  | (91%) | b | 4'523  | (89%)  | b | 6'528   | (84%) | b |
|                       | DAS       | 4'759                                                         | a | 155    | (97%) | b | 213    | (-96%) | b | 837     | (82%) | b |
|                       | NIV       | 176                                                           | a | 3      | (98%) | b | 2      | (99%)  | b | 44      | (75%) | b |
